# Supplementary material for: Ratiometric Fluorescence Immunoassay Based on Carbon Quantum Dots for Sensitive Detection of Malachite Green in Fish
Source: MDPI journal article supplement (doi:10.3390/bios13010038), 2022-12-27
Supplement: s1 [file s1]

## Supplementary information

### Ratiometric fluorescence immunoassay based on carbon quantum dots for sensitive detection of malachite green in fish

Guangxin Yang<sup>1,2,†</sup>, Jingru Zhang<sup>1,2,†</sup>, Lin Gu<sup>2</sup>, Yunyu Tang<sup>1,\*</sup>, Xuan Zhang<sup>1</sup>,  
Xuanyun Huang<sup>1</sup>, Xiaosheng Shen<sup>1</sup>, Wenlei Zhai<sup>3</sup>, Essy Kouadio Fodjo<sup>4</sup>, Cong Kong<sup>1,\*</sup>

<sup>1</sup> East China Sea Fisheries Research Institute, Chinese Academy of Fishery Sciences, Shanghai 200090, China

<sup>2</sup> School of Environment and Architecture, University of Shanghai for Science and Technology, Shanghai 200090, China

<sup>3</sup> Institute of Quality Standard and Testing Technology, Beijing Academy of Agriculture and Forestry Science, No. 9 Middle Road of Shuguanghuayuan, Haidian District, Beijing 100097, China

<sup>4</sup> Physical Chemistry Laboratory, UFR SSMT, Université Felix Houphouët Boigny, 22 BP 582 Abidjan 22, Cote d'Ivoire

† These authors contributed equally to this work.

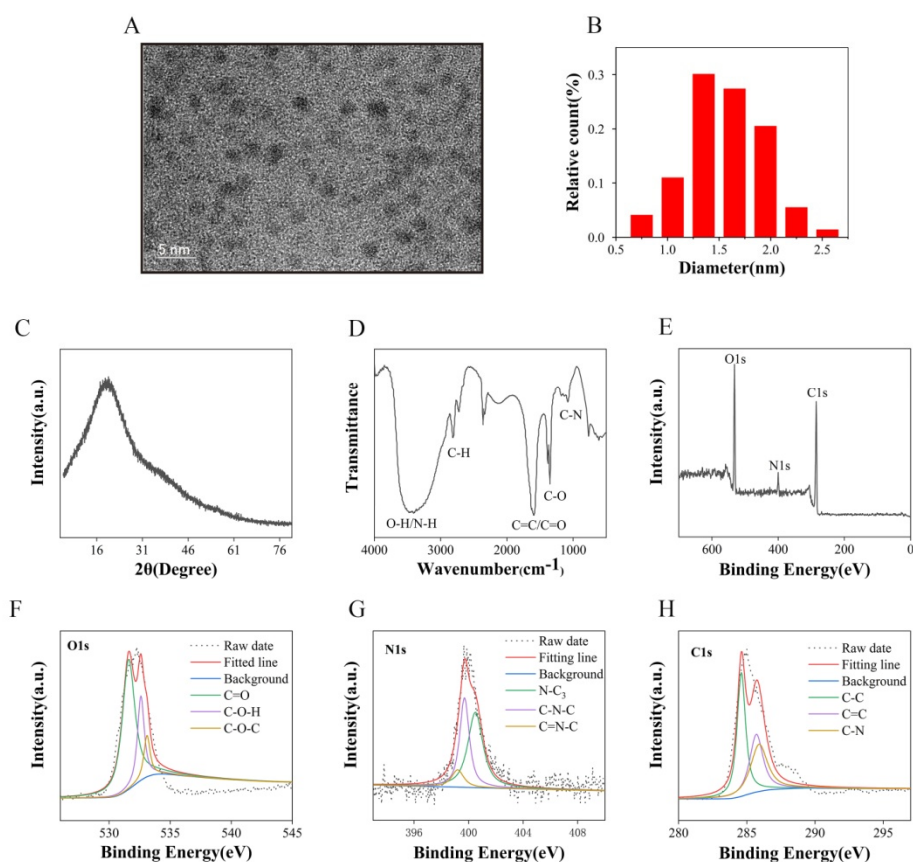

**Figure S1.** (A) TEM image, (B) Particle size distribution, (C) XRD spectrum, (D) FTIR spectrum, (E)

Full scan XPS, (F) O1s of XPS spectrum, (G) N1s of XPS spectrum, and (H) C1s of XPS spectrum of N-CQDs.

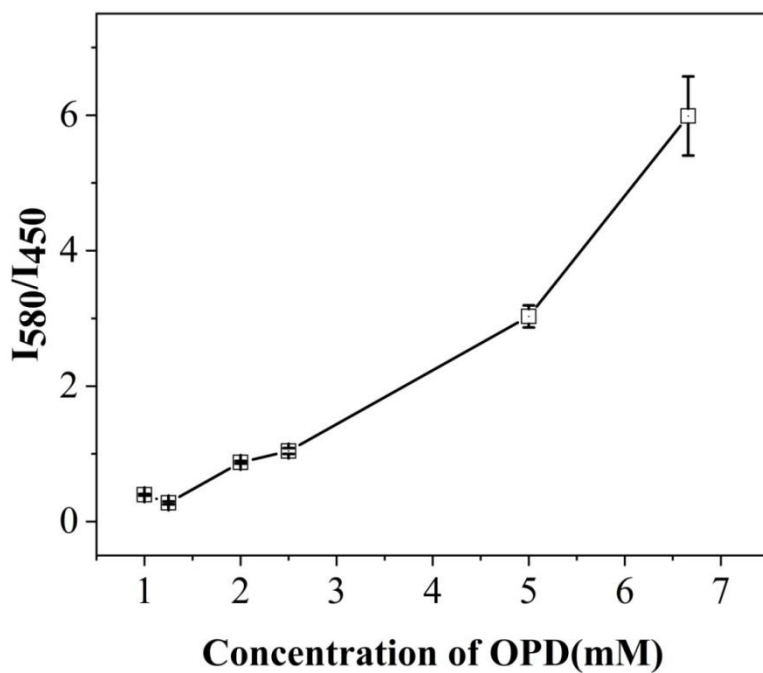

**Figure S2.** The  $I_{580}/I_{450}$  of the ratiometric fluorescent immunoassay for the addition of different amounts of OPD for optimization.

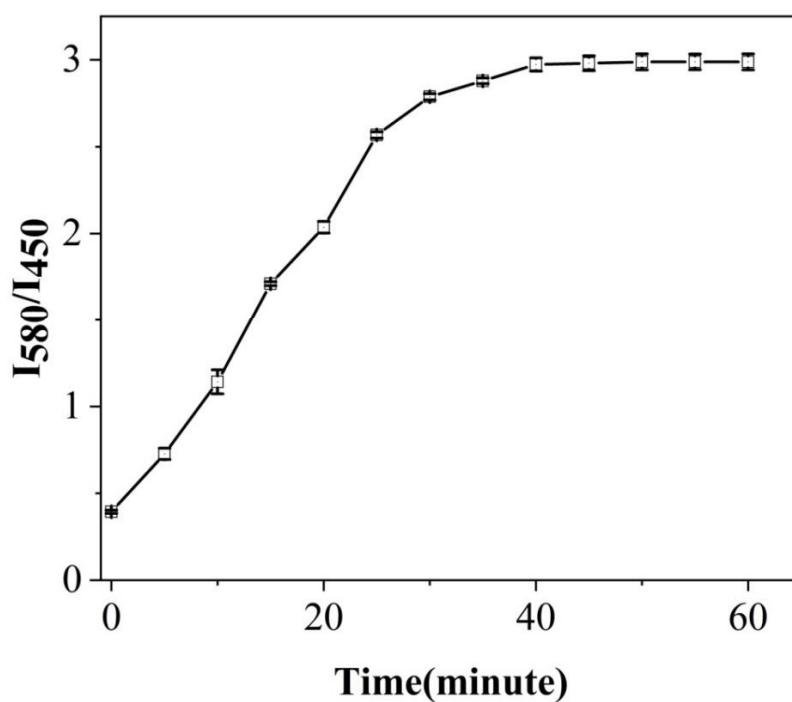

**Figure S3.** The  $I_{580}/I_{450}$  of the ratiometric fluorescent immunoassay with the evolution of reaction time.

**Table S1.** The optimization of the concentrations of MG-OVA and MG-Ab.

| Dilution of | Dilution of MG-OVA |        |        |         |         |
|-------------|--------------------|--------|--------|---------|---------|
| MG-Ab       | 1:2000             | 1:4000 | 1:8000 | 1:16000 | 1:32000 |
| 1:2000      | 1.31               | 1.693  | 1.6    | 0.981   | 0.583   |
| 1:4000      | 1.008              | 0.805  | 0.704  | 0.487   | 0.372   |
| 1:8000      | 0.996              | 0.785  | 0.677  | 0.482   | 0.321   |
| 1:16000     | 0.376              | 0.278  | 0.255  | 0.228   | 0.245   |
| 1:32000     | 0.413              | 0.334  | 0.296  | 0.243   | 0.197   |

**Table S2.** Comparison of the method with those in the previous literature for the detection of MG.

| Method             | Materials                                                    | Linear range                            | LODs                                                      | Refs |
|--------------------|--------------------------------------------------------------|-----------------------------------------|-----------------------------------------------------------|------|
| Spectrofluorimetry | Nitrogen-doped carbon quantum dots                           | 10-80 $\mu\text{mol L}^{-1}$            | 5.16 $\mu\text{mol L}^{-1}$ (1.8 $\text{mg L}^{-1}$ )     | [1]  |
|                    | Fluorescent Al-MOF nanosheet                                 | 5.3-200 $\mu\text{mol L}^{-1}$          | 1.6 $\mu\text{mol L}^{-1}$                                | [2]  |
|                    | Carbon dots                                                  | 0.07-2.5 $\mu\text{mol L}^{-1}$         | 21 $\text{nmol L}^{-1}$ (7.66 $\text{ng mL}^{-1}$ )       | [3]  |
|                    | CdTe quantum dots coated with molecularly imprinted silica   | 0.08 to 20 $\mu\text{mol L}^{-1}$       | 12 $\mu\text{g}\cdot\text{kg}^{-1}$                       | [4]  |
| Immunoassay        | Bovine serum albumin-stabilized Au nanoclusters              | 0.3-20 $\mu\text{mol L}^{-1}$           | 0.19 $\mu\text{mol L}^{-1}$ (69.26 $\mu\text{g L}^{-1}$ ) | [5]  |
|                    | Molecularly imprinted polymer film                           | 0.27-274 $\text{nmol L}^{-1}$           | 0.82 $\text{nmol L}^{-1}$                                 | [6]  |
|                    | $\text{Fe}_3\text{O}_4\text{NPs}$                            | 0.06–2.38 $\mu\text{mol L}^{-1}$        | 16.7 $\mu\text{g}\cdot\text{kg}^{-1}$                     | [7]  |
|                    | CdTe quantum dots coated with molecularly imprinted polymers | 0.1–32 $\mu\text{mol L}^{-1}$           | 8.8 $\mu\text{g}\cdot\text{kg}^{-1}$                      | [8]  |
| This work          | N-CQDs                                                       | 0.1-12.8 $\text{ng}\cdot\text{mL}^{-1}$ | 0.097 $\mu\text{g}\cdot\text{kg}^{-1}$                    |      |

## References

1. Singh, R., and Singh, R. K. Detection of Malachite Green in Water Using Edge Excited Label Free Fluorescent Probe Ncqs. *J. Fluoresc.* **2020**, *30*, 1281-85.
2. Yue, X. Y., Li, Y., Xu, S., Li, J. G., Li, M., Jiang, L. Y., Jie, M. S., and Bai, Y. H. A Portable Smartphone-Assisted Ratiometric Fluorescence Sensor for Intelligent and Visual Detection of Malachite Green. *Food Chem.* **2022**, *371*, 131164.
3. Hu, Y., Gao, Z. J., and Luo, J. F. Fluorescence Detection of Malachite Green in Fish Tissue Using Red Emissive Se,N,Cl-Doped Carbon Dots. *Food Chem.* **2021**, *335*, 127677.

4. Wu, L., Lin, Z. Z., Zhong, H. P., Peng, A. H., Chen, X. M., and Huang, Z. Y. Rapid Detection of Malachite Green in Fish Based on Cdte Quantum Dots Coated with Molecularly Imprinted Silica. *Food Chem.* **2017**, 229, 847-53.
5. Ju, Y. J., Li, N., Liu, S. G., Han, L., Xiao, N., Luo, H. Q., and Li, N. B. Ratiometric Fluorescence Method for Malachite Green Detection Based on Dual-Emission Bsa-Protected Gold Nanoclusters. *Sensor. Actuat. B-Chem.* **2018**, 275, 244-50.
6. Li, L., Peng, A. H., Lin, Z. Z., Zhong, H. P., Chen, X. M., and Huang, Z. Y. Biomimetic Elisa Detection of Malachite Green Based on Molecularly Imprinted Polymer Film. *Food Chem.* **2017**, 229, 403-08.
7. Wang, J., Zhao, C., Hong, C. Y., Lin, Z. Z., and Huang, Z. Y. Rapid Detection of Malachite Green in Fish and Water Based on the Peroxidase-Like Activity of Fe<sub>3</sub>O<sub>4</sub>nps Enhanced with Aptamer. *J. Food Compos. Anal.* **2021**, 104, 104162.
8. Ran, H., Lin, Z. Z., Yao, Q. H., Hong, C. Y., and Huang, Z. Y. Ratiometric Fluorescence Probe of Mips@Cdte Qds for Trace Malachite Green Detection in Fish. *Anal. Bioanal. Chem.* **2019**, 411, 537-44.
